# Supplementary material for: Adverse muscle composition is linked to poor functional performance and metabolic comorbidities in NAFLD
Source: PubMed Central journal article supplement — JHEP Rep. 2020 Oct 28;3(1):100197. doi: 10.1016/j.jhepr.2020.100197 (PMC7868647; doi:10.1016/j.jhepr.2020.100197), 2020-10-28
Supplement: mmc1.pdf [file mmc1.pdf]

# **Adverse muscle composition is linked to poor functional performance and metabolic comorbidities in NAFLD**

Jennifer Linge, Mattias Ekstedt, Olof Dahlqvist Leinhard

|                               |    |
|-------------------------------|----|
| Table of contents             |    |
| Supplementary materials.....  | 2  |
| Table S1.....                 | 3  |
| Table S2.....                 | 4  |
| Supplementary results.....    | 6  |
| Table S3.....                 | 6  |
| Table S4.....                 | 8  |
| Table S5.....                 | 9  |
| Supplementary references..... | 11 |

## Supplementary materials

### Protocol description for recording of hand grip strength in UK Biobank (UK Biobank Field IDs 46, 47)

(Cited. <http://biobank.ndph.ox.ac.uk/showcase/docs/Gripstrength.pdf>, Accessed April 2019)

1. The staff member explains that the first measure will be of grip strength (indicating the Jamar dynamometer device to be used) and that strength in both hands will be measured in turn.
2. The participant is asked to sit upright in a chair and place their forearms on armrests. With dynamometer handle set to the second incremental slot the participant is asked to hold it first in their right hand. For participants with very large hands the handle is moved to the third slot.
3. The participant's elbow of the arm holding the dynamometer is against their side and bent to a 90° angle so that their forearm is pointing forwards with their thumb uppermost. Their wrist is straight so that their hand is either pointing forwards or bent slightly outwards.
4. The staff member supports the dynamometer lightly with one hand and rotates the red peak-hold needle anti-clockwise to zero. They explain to the participant that the adjustable handle of the dynamometer does not move while they are gripping it, but it will measure the strength of their grip. The participant is asked to squeeze the handle of the dynamometer as strongly as they can for about 3 seconds. They are given encouragement while doing so.
5. After 3 seconds the participant is asked to stop, the dynamometer is taken from them and the maximum hand grip strength is read in whole kilogram force units as indicated on the outer aspect of the dial by the red peak-hold needle. This value is entered into the computer (see below).

### MRI scanning protocol and image analysis

The subjects were scanned in supine position in a Siemens MAGNETOM Aera 1.5 T MRI scanner (Siemens, Erlangen, Germany) using the dual-echo Dixon Vibe protocol covering neck to knees. Common parameters for all slabs were: flip angle=10°, TR=6.69 ms, TE=2.39/4.77 ms, and bandwidth=440 Hz. The first slab, over the neck, consisted of 64 slices, voxel size 2.23×2.23×3 mm<sup>3</sup>, and 224×168 matrix; slabs two to four were acquired during 17-second expiration breath-holds with 44 slices, voxel size 2.23×2.23×4.5 mm<sup>3</sup>, and 224×174 matrix; slab five consisted of 72 slices, voxel size 2.23×2.23×3.5 mm<sup>3</sup>, and 224×162 matrix; slab six of 64 slices, voxel size 2.23×2.23×4 mm<sup>3</sup>, and 224×156 matrix.

For liver proton density fat fraction (PDFF) quantification, nine regions of interest (ROI) were placed while avoiding major vessels and bile ducts (see figure to the right). The liver water, fat and T2\* of each ROI were computed by magnitude-based chemical shift technique<sup>1</sup> with a 6-peak lipid model<sup>2</sup>. To correct for T1-bias, caused by differences in water and fat T1, a correction factor was applied to the water signal. The correction factor was computed using the body Dixon images of the first 3,000 scanned UK Biobank participants as reference. The liver ROIs were transferred to, and compared with, the fat Dixon images intensities, which were calibrated using the adipose tissue as an intensity reference<sup>3,4</sup> and corrected using the liver T2\*, a process which results in T1 insensitive fat measurements<sup>5</sup>.

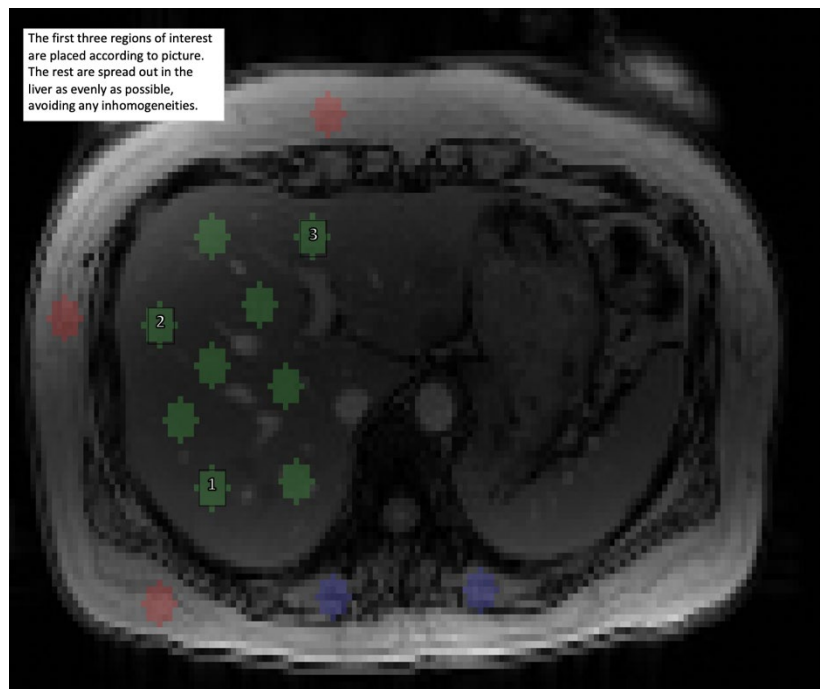

For whole body measurements, the image analysis consisted of (1) image calibration, (2) fusion of image stacks, (3) image segmentation, and (4) quantification of fat and muscle volumes<sup>4,6-9</sup> and included manual quality

control by an analysis engineer. Muscle volumes were calculated as fat-tissue free muscle volumes<sup>4</sup>. MFI was calculated as the average T2\*-corrected fat value and converted to proton density fat fraction (PDFF)<sup>2</sup>.

## Translation of current sarcopenia thresholds from DXA to MRI

**Methods:** To leverage the full dataset (N=9,545) for sarcopenia assessment, sex-specific thresholds for low muscle quantity based on DXA (ALM/height<sup>2</sup> <6.0/7.0 kg/m<sup>2</sup> (females/males)) were translated to MRI (thigh FFMV/height<sup>2</sup>) utilizing the subset with DXA and hand grip strength data available (N=4,553). Thresholds were determined by optimizing sensitivity and specificity for detecting individuals with low muscle quantity. Diagnostic performance (area under receiver operator characteristic (AUROC) curve), sensitivity, and specificity for sarcopenia detection were determined using derived FFMV/height<sup>2</sup> thresholds compared to ALM/height<sup>2</sup> thresholds.

**Results:** The correlation between ALM/height<sup>2</sup> and thigh FFMV/height<sup>2</sup> was 0.93 (95% CI: 0.92-0.93). Resulting thresholds for thigh FFMV/height<sup>2</sup> were 3.0/3.6 L/m<sup>2</sup> (females/males). Sensitivity and specificity for sarcopenia detection using MRI-measured thigh FFMV/height<sup>2</sup> instead of DXA-measured ALM/height<sup>2</sup> were 0.93 and 0.99, respectively. AUROC was 0.96 (95% CI: 0.93-0.98). Applying sarcopenia-detection thresholds based on DXA-based ALM/height<sup>2</sup> and hand grip strength stratified 101 (2.2%) participants from the DXA subset. Applying derived MRI-based thigh FFMV/height<sup>2</sup> and hand grip strength thresholds for sarcopenia detection stratified 241 (2.5%) participants from the whole cohort. Supplemental material includes a comparison between characteristics for the DXA subset and the whole cohort (**Table S1** below).

**Table S1.** Cohort characteristics comparing complete dataset (whole cohort) to DXA subset. Values are mean (standard deviation). For liver fat, median (interquartile range) is shown. VCG, virtual control group adjusted. Low hand grip defined as below 16/27 kg (females/males). † Data extracted from baseline assessment (years 2006–2010).

|                                                                | Whole cohort        | Females             | Males               | DXA subset          |
|----------------------------------------------------------------|---------------------|---------------------|---------------------|---------------------|
| N participants                                                 | 9,545               | 5,026               | 4,519               | 4,553               |
| % females                                                      | 52.66               | 100.00              | 0.00                | 53.00               |
| Age, years                                                     | 62.59 (7.49)        | 61.86 (7.33)        | 63.41 (7.59)        | 62.31 (7.51)        |
| Weight, kg                                                     | 75.52 (14.77)       | 68.66 (12.91)       | 83.14 (12.85)       | 75.46 (14.77)       |
| Height, cm                                                     | 169.06 (8.93)       | 162.96 (6.15)       | 175.84 (6.26)       | 168.99 (9.05)       |
| BMI, kg/m <sup>2</sup>                                         | 26.34 (4.33)        | 25.86 (4.71)        | 26.87 (3.8)         | 26.34 (4.33)        |
| Visceral adipose tissue volume (L)                             | 3.68 (2.21)         | 2.63 (1.51)         | 4.84 (2.27)         | 3.69 (2.21)         |
| Abdominal subcutaneous adipose tissue volume (L)               | 7.01 (3.19)         | 8.04 (3.41)         | 5.85 (2.46)         | 7 (3.15)            |
| Appendicular lean mass/height <sup>2</sup> , kg/m <sup>2</sup> | 7.34 (1.23)         | 6.55 (0.85)         | 8.24 (0.94)         | 7.34 (1.23)         |
| Liver fat, %                                                   | 2.36<br>(1.49-4.57) | 1.99<br>(1.34-3.73) | 2.85<br>(1.74-5.59) | 2.35<br>(1.49-4.62) |
| <b>Muscle composition</b>                                      |                     |                     |                     |                     |
| Fat-tissue free muscle volume, L                               | 10.34 (2.56)        | 8.36 (1.18)         | 12.54 (1.77)        | 10.25 (2.56)        |
| Fat-tissue free muscle volume z-score (FFMV <sub>VCG</sub> )   | 0.00 (0.98)         | 0.00 (0.99)         | 0.00 (0.98)         | -0.07 (0.97)        |
| Muscle fat infiltration, %                                     | 7.40 (1.85)         | 7.92 (1.83)         | 6.83 (1.71)         | 7.44 (1.81)         |
| % Adverse muscle composition (AMC)                             | 10.20 %             | 9.47 %              | 11.02 %             | 10.74 %             |
| % Only high muscle fat                                         | 14.76 %             | 15.44 %             | 14.01 %             | 14.78 %             |
| % Only low muscle volume                                       | 14.57 %             | 15.60 %             | 13.43 %             | 16.25 %             |
| % Normal muscle composition                                    | 60.46 %             | 59.49 %             | 61.54 %             | 58.23 %             |
| <b>Functional performance &amp; metabolic comorbidity</b>      |                     |                     |                     |                     |
| Sarcopenia                                                     | 2.52 %              | 3.20 %              | 1.77 %              | 3.34 %              |
| Low hand grip strength                                         | 6.34 %              | 6.65 %              | 6.00 %              | 8.02 %              |
| Slow walking pace                                              | 4.40 %              | 4.80 %              | 3.96 %              | 4.22 %              |
| No stair climbing                                              | 7.87 %              | 7.62 %              | 8.14 %              | 7.29 %              |
| More than one fall last year                                   | 4.83 %              | 5.83 %              | 3.72 %              | 4.61 %              |

|                                        |               |               |               |               |
|----------------------------------------|---------------|---------------|---------------|---------------|
| Coronary heart disease (prevalent)     | 4.70 %        | 2.71 %        | 6.93 %        | 4.96 %        |
| Coronary heart disease (incident)      | 1.72 %        | 0.78 %        | 2.77 %        | 2.35 %        |
| Type 2 diabetes                        | 4.48 %        | 2.88 %        | 6.26 %        | 4.33 %        |
| <b>Biomarker panel<sup>f</sup></b>     |               |               |               |               |
| Glycated haemoglobin (HbA1c), mmol/mol | 35.11 (5.00)  | 34.9 (4.58)   | 35.35 (5.42)  | 35.07 (4.96)  |
| Glucose mmol/L                         | 5.01 (1.01)   | 4.96 (0.84)   | 5.06 (1.16)   | 5.00 (1.06)   |
| Albumin, g/L                           | 45.29 (2.51)  | 45.03 (2.53)  | 45.56 (2.47)  | 45.21 (2.49)  |
| Direct bilirubin, umol/L               | 1.84 (0.79)   | 1.67 (0.69)   | 1.99 (0.84)   | 1.85 (0.81)   |
| Total bilirubin, umol/L                | 9.33 (4.49)   | 8.31 (3.83)   | 10.45 (4.87)  | 9.39 (4.60)   |
| Gamma glutamyltransferase, U/L         | 34.14 (33.93) | 27.31 (27.95) | 41.63 (38.09) | 34.52 (35.79) |
| Alanine aminotransferase, U/L          | 22.9 (14.06)  | 19.51 (13.51) | 26.62 (13.71) | 23.10 (14.66) |
| Aspartate aminotransferase, U/L        | 25.84 (11.70) | 24.11 (12.98) | 27.75 (9.75)  | 25.99 (13.29) |
| Cholesterol, mmol/L                    | 5.72 (1.09)   | 5.88 (1.07)   | 5.56 (1.10)   | 5.71 (1.09)   |
| HDL-cholesterol, mmol/L                | 1.47 (0.37)   | 1.62 (0.37)   | 1.30 (0.30)   | 1.46 (0.37)   |
| LDL direct, mmol/L                     | 3.58 (0.83)   | 3.62 (0.82)   | 3.54 (0.84)   | 3.57 (0.83)   |
| Triglycerides, mmol/L                  | 1.67 (0.98)   | 1.46 (0.80)   | 1.89 (1.10)   | 1.67 (0.99)   |
| C-reactive protein, mg/L               | 2.17 (3.68)   | 2.25 (3.70)   | 2.07 (3.66)   | 2.15 (3.70)   |
| AST:ALT                                | 1.27 (0.44)   | 1.37 (0.45)   | 1.16 (0.40)   | 1.27 (0.44)   |
| FIB-4                                  | 1.32 (0.52)   | 1.24 (0.48)   | 1.42 (0.55)   | 1.32 (0.54)   |
| NAFLD fibrosis score (NFS)             | -2.04 (1.00)  | -2.17 (1.00)  | -1.90 (0.98)  | -2.04 (1.00)  |

## Regression modelling of muscle biomarkers and functional performance

Logistic regression modelling was used to investigate the associations between each outcome and muscle volume (FFMV<sub>VCG</sub>) and muscle fat (MFI) as continuous variables. Results showed both FFMV<sub>VCG</sub> and MFI were significantly associated with low hand grip strength, slow walking pace, CHD and T2D within NAFLD. Differences between variables were found for stair climbing (FFMV<sub>VCG</sub> significant; MFI nonsignificant) and falls (MFI significant; FFMV<sub>VCG</sub> nonsignificant). **Table S2** presents summary of results below.

**Table S2.** Results from logistic regression modelling within the NAFLD population using fat-tissue free muscle volume z-score (FFMV<sub>VCG</sub>) and muscle fat infiltration<sub>adj</sub> (MFI<sub>adj</sub> – sex-adjusted MFI) as predictors respectively. Models adjusted for sex, age, BMI and liver fat. VCG, virtual control group adjusted.

|                            | Muscle volume z-score (FFMV <sub>VCG</sub> ) |         | Muscle fat infiltration <sub>adj</sub> (MFI <sub>adj</sub> ) |         |
|----------------------------|----------------------------------------------|---------|--------------------------------------------------------------|---------|
|                            | Odds ratio                                   | p-value | Odds ratio                                                   | p-value |
| Low hand grip strength     | 0.60 (0.46-0.78)                             | <0.001  | 1.21 (1.08-1.36)                                             | 0.001   |
| Slow walking pace          | 0.58 (0.45-0.73)                             | <0.001  | 1.27 (1.14-1.42)                                             | <0.001  |
| No stair climbing          | 0.78 (0.62-0.96)                             | 0.023   | 1.04 (0.93-1.15)                                             | ns      |
| More than 1 fall last year | 0.83 (0.64-1.07)                             | ns      | 1.16 (1.03-1.30)                                             | 0.012   |
| Coronary heart disease     | 0.68 (0.53-0.88)                             | 0.003   | 1.22 (1.09-1.36)                                             | <0.001  |
| Type 2 diabetes            | 0.64 (0.52-0.78)                             | <0.001  | 1.30 (1.19-1.43)                                             | <0.001  |

## Medications

**Insulin:** Participants taking insulin were identified using UK Biobank field IDs 6153 ‘Medication for cholesterol, blood pressure, diabetes, or take exogenous hormones’, 6177 ‘Medication for cholesterol, blood pressure or diabetes’ (gathered through touchscreen questionnaires). Participants reporting using of insulin at any of the visits were considered currently on insulin treatment.

**Statins:** Participants taking statins were identified by searching UK Biobank field ID 20003 ‘Treatment/medication code’ (gathered through verbal interview with a trained nurse) for the UK brands listed below. Participants with any of the corresponding codes reported were considered currently on statin treatment.

| Brand name   | UK Biobank<br>Field ID 20003 coding | Brand name   | UK Biobank<br>Field ID 20003 coding |
|--------------|-------------------------------------|--------------|-------------------------------------|
| advicor      | Not found                           | lipostat     | 1140861970                          |
| altocor      | Not found                           | livalo       | Not found                           |
| altoprev     | Not found                           | lovastatin   | Not found                           |
| atorvastatin | 1141146234                          | mevacor      | Not found                           |
| baycol       | Not found                           | pitava       | Not found                           |
| compactin    | Not found                           | pravastatin  | 1140888648                          |
| crestor      | 1141192414                          | ptavastatin  | Not found                           |
| fluvastatin  | 1140888594                          | rosuvastatin | 1141192410                          |
| lescol       | 1140864592                          | simvastatin  | 1140861958                          |
| lipex        | Not found                           | vyforin      | Not found                           |
| lipitor      | 1141146138                          | zecor        | Not found                           |

## Supplementary results

**Table S3** Comparison of population characteristics between different muscle composition groups within NAFLD: (1) adverse muscle composition (AMC), (2) low FFMV<sub>VCG</sub> only, (3) high MFI only, and (4) moderate to high FFMV<sub>VCG</sub> and low to moderate MFI (normal muscle composition). Factor shows difference in mean between the two groups. p-values shown for unadjusted and adjusted (sex, age, BMI, liver fat) modelling. FFMV, fat-tissue free muscle volume; MFI, muscle fat infiltration; PDFF, proton density fat fraction; VCG, virtual control group adjusted.

| Muscle composition groups within NAFLD                                                          | Population characteristics                      | Factor | p-value | p-value (adjusted) |
|-------------------------------------------------------------------------------------------------|-------------------------------------------------|--------|---------|--------------------|
| (1) Adverse muscle composition (AMC)<br>vs<br>(4) Normal muscle composition                     | % Females                                       | 0.98   | 0.822   | -                  |
|                                                                                                 | Age                                             | 1.08   | <0.001  | -                  |
|                                                                                                 | Weight                                          | 1.04   | 0.006   | 0.794              |
|                                                                                                 | BMI                                             | 1.06   | <0.001  | -                  |
|                                                                                                 | % With overweight (BMI > 25 kg/m <sup>2</sup> ) | 1.09   | 0.005   | 0.999              |
|                                                                                                 | Visceral adipose tissue                         | 1.28   | <0.001  | <0.001             |
|                                                                                                 | Abdominal subcutaneous adipose tissue           | 1.19   | <0.001  | <0.001             |
|                                                                                                 | Fat-tissue free muscle volume                   | 0.84   | <0.001  | <0.001             |
|                                                                                                 | Appendicular lean mass/height <sup>2</sup>      | 0.93   | <0.001  | <0.001             |
| Liver fat (PDFF)                                                                                | 1.01                                            | 0.772  | -       |                    |
| (1) Adverse muscle composition (AMC)<br>vs<br>(2) Only low muscle volume (FFMV <sub>VCG</sub> ) | % Females                                       | 1.01   | 0.967   | -                  |
|                                                                                                 | Age                                             | 1.04   | 0.002   | -                  |
|                                                                                                 | Weight                                          | 1.12   | <0.001  | 0.243              |
|                                                                                                 | BMI                                             | 1.12   | <0.001  | -                  |
|                                                                                                 | % With overweight (BMI > 25 kg/m <sup>2</sup> ) | 1.37   | <0.001  | 1.000              |
|                                                                                                 | Visceral adipose tissue                         | 1.27   | <0.001  | <0.001             |
|                                                                                                 | Abdominal subcutaneous adipose tissue           | 1.22   | <0.001  | 0.998              |
|                                                                                                 | Fat-tissue free muscle volume                   | 1.02   | 0.517   | 0.265              |
|                                                                                                 | Appendicular lean mass/height <sup>2</sup>      | 1.05   | 0.066   | 0.188              |
| Liver fat (PDFF)                                                                                | 1.12                                            | 0.103  | -       |                    |
| (1) Adverse muscle composition (AMC)<br>vs<br>(3) Only high muscle fat (MFI)                    | % Females                                       | 0.68   | <0.001  | -                  |
|                                                                                                 | Age                                             | 1.03   | 0.003   | -                  |
|                                                                                                 | Weight                                          | 0.96   | 0.011   | 0.174              |
|                                                                                                 | BMI                                             | 0.94   | <0.001  | -                  |
|                                                                                                 | % With overweight (BMI > 25 kg/m <sup>2</sup> ) | 1.02   | 0.490   | 0.997              |
|                                                                                                 | Visceral adipose tissue                         | 1.10   | 0.002   | <0.001             |
|                                                                                                 | Abdominal subcutaneous adipose tissue           | 0.90   | 0.001   | <0.001             |
|                                                                                                 | Fat-tissue free muscle volume                   | 0.90   | <0.001  | <0.001             |
|                                                                                                 | Appendicular lean mass/height <sup>2</sup>      | 0.90   | <0.001  | <0.001             |
| Liver fat (PDFF)                                                                                | 0.89                                            | 0.024  | -       |                    |
| (2) Only low muscle volume (FFMV <sub>VCG</sub> )<br>vs<br>(4) Normal muscle composition        | % Females                                       | 0.97   | 0.807   | -                  |
|                                                                                                 | Age                                             | 1.03   | 0.010   | -                  |
|                                                                                                 | Weight                                          | 0.93   | <0.001  | 0.098              |
|                                                                                                 | BMI                                             | 0.94   | <0.001  | -                  |
|                                                                                                 | % With overweight (BMI > 25 kg/m <sup>2</sup> ) | 0.80   | <0.001  | 0.997              |
|                                                                                                 | Visceral adipose tissue                         | 1.01   | 0.848   | 0.003              |
|                                                                                                 | Abdominal subcutaneous adipose tissue           | 0.98   | 0.603   | <0.001             |
|                                                                                                 | Fat-tissue free muscle volume                   | 0.83   | <0.001  | <0.001             |
|                                                                                                 | Appendicular lean mass/height <sup>2</sup>      | 0.88   | <0.001  | <0.001             |
| Liver fat (PDFF)                                                                                | 0.91                                            | 0.089  | -       |                    |
| (2) Only low muscle volume (FFMV <sub>VCG</sub> )<br>vs<br>(3) Only high muscle fat (MFI)       | % Females                                       | 0.68   | <0.001  | -                  |
|                                                                                                 | Age                                             | 0.99   | 0.441   | -                  |
|                                                                                                 | Weight                                          | 0.85   | <0.001  | 0.016              |
|                                                                                                 | BMI                                             | 0.84   | <0.001  | -                  |
|                                                                                                 | % With overweight (BMI > 25 kg/m <sup>2</sup> ) | 0.74   | <0.001  | 0.996              |
|                                                                                                 | Visceral adipose tissue                         | 0.87   | <0.001  | 0.649              |
| Abdominal subcutaneous adipose tissue                                                           | 0.74                                            | <0.001 | <0.001  |                    |

|                                                                       |                                                 |      |        |        |
|-----------------------------------------------------------------------|-------------------------------------------------|------|--------|--------|
|                                                                       | Fat-tissue free muscle volume                   | 0.88 | <0.001 | <0.001 |
|                                                                       | Appendicular lean mass/height <sup>2</sup>      | 0.85 | <0.001 | <0.001 |
|                                                                       | Liver fat (PDFF)                                | 0.80 | <0.001 | -      |
| (3) Only high muscle fat (MFI)<br>vs<br>(4) Normal muscle composition | % Females                                       | 1.44 | <0.001 | -      |
|                                                                       | Age                                             | 1.04 | <0.001 | -      |
|                                                                       | Weight                                          | 1.09 | <0.001 | 0.150  |
|                                                                       | BMI                                             | 1.12 | <0.001 | -      |
|                                                                       | % With overweight (BMI > 25 kg/m <sup>2</sup> ) | 1.07 | 0.004  | 0.996  |
|                                                                       | Visceral adipose tissue                         | 1.16 | <0.001 | <0.001 |
|                                                                       | Abdominal subcutaneous adipose tissue           | 1.32 | <0.001 | 0.161  |
|                                                                       | Fat-tissue free muscle volume                   | 0.94 | <0.001 | 0.002  |
|                                                                       | Appendicular lean mass/height <sup>2</sup>      | 1.04 | 0.022  | 0.079  |
|                                                                       | Liver fat (PDFF)                                | 1.13 | 0.001  | -      |

**Table S4** Comparison between different muscle composition groups within NAFLD: (1) adverse muscle composition (AMC), (2) low FFMV<sub>VCG</sub> only, (3) high MFI only, and (4) moderate to high FFMV<sub>VCG</sub> and low to moderate MFI (normal muscle composition). Factor shows difference in prevalence of outcomes between the two groups. p-values shown for unadjusted and adjusted (sex, age, BMI, liver fat) modelling. FFMV, fat-tissue free muscle volume; MFI, muscle fat infiltration; VCG, virtual control group adjusted. Low hand grip defined as below 16/27 kg (females/males).

| <b>Muscle composition groups within NAFLD</b>                                                   | <b>Functional performance &amp; metabolic comorbidity</b> | <b>Factor</b> | <b>p-value</b> | <b>p-value (adjusted)</b> |
|-------------------------------------------------------------------------------------------------|-----------------------------------------------------------|---------------|----------------|---------------------------|
| (1) Adverse muscle composition (AMC)<br>vs<br>(4) Normal muscle composition                     | Low hand grip strength                                    | 2.24          | 0.006          | 0.026                     |
|                                                                                                 | Slow walking pace                                         | 3.87          | <0.001         | <0.001                    |
|                                                                                                 | No stair climbing                                         | 1.86          | 0.007          | 0.191                     |
|                                                                                                 | More than one fall last year                              | 2.70          | <0.001         | 0.001                     |
|                                                                                                 | Coronary heart disease (prevalent)                        | 3.84          | <0.001         | <0.001                    |
|                                                                                                 | Coronary heart disease (incident)                         | 1.86          | 0.122          | 0.390                     |
|                                                                                                 | Type 2 diabetes                                           | 3.31          | <0.001         | <0.001                    |
| (1) Adverse muscle composition (AMC)<br>vs<br>(2) Only low muscle volume (FFMV <sub>VCG</sub> ) | Low hand grip strength                                    | 1.27          | 0.527          | 0.623                     |
|                                                                                                 | Slow walking pace                                         | 2.19          | 0.027          | 0.538                     |
|                                                                                                 | No stair climbing                                         | 1.66          | 0.129          | 0.421                     |
|                                                                                                 | More than one fall last year                              | 3.70          | 0.012          | 0.023                     |
|                                                                                                 | Coronary heart disease (prevalent)                        | 2.58          | 0.005          | 0.076                     |
|                                                                                                 | Coronary heart disease (incident)                         | 4.93          | 0.116          | 0.225                     |
|                                                                                                 | Type 2 diabetes                                           | 1.41          | 0.143          | 0.670                     |
| (1) Adverse muscle composition (AMC)<br>vs<br>(3) Only high muscle fat (MFI)                    | Low hand grip strength                                    | 1.38          | 0.310          | 0.354                     |
|                                                                                                 | Slow walking pace                                         | 1.08          | 0.754          | 0.076                     |
|                                                                                                 | No stair climbing                                         | 1.47          | 0.134          | 0.301                     |
|                                                                                                 | More than one fall last year                              | 1.69          | 0.073          | 0.019                     |
|                                                                                                 | Coronary heart disease (prevalent)                        | 2.79          | <0.001         | 0.001                     |
|                                                                                                 | Coronary heart disease (incident)                         | 2.37          | 0.106          | 0.180                     |
|                                                                                                 | Type 2 diabetes                                           | 1.25          | 0.198          | 0.139                     |
| (2) Only low muscle volume (FFMV <sub>VCG</sub> )<br>vs<br>(4) Normal muscle composition        | Low hand grip strength                                    | 1.76          | 0.114          | 0.182                     |
|                                                                                                 | Slow walking pace                                         | 1.76          | 0.130          | 0.028                     |
|                                                                                                 | No stair climbing                                         | 1.12          | 0.729          | 0.920                     |
|                                                                                                 | More than one fall last year                              | 0.73          | 0.547          | 0.629                     |
|                                                                                                 | Coronary heart disease (prevalent)                        | 1.49          | 0.275          | 0.357                     |
|                                                                                                 | Coronary heart disease (incident)                         | 0.38          | 0.356          | 0.391                     |
|                                                                                                 | Type 2 diabetes                                           | 2.35          | 0.001          | <0.001                    |
| (2) Only low muscle volume (FFMV <sub>VCG</sub> )<br>vs<br>(3) Only high muscle fat (MFI)       | Low hand grip strength                                    | 1.09          | 0.847          | 0.803                     |
|                                                                                                 | Slow walking pace                                         | 0.49          | 0.034          | 0.541                     |
|                                                                                                 | No stair climbing                                         | 0.88          | 0.690          | 0.975                     |
|                                                                                                 | More than one fall last year                              | 0.46          | 0.139          | 0.380                     |
|                                                                                                 | Coronary heart disease (prevalent)                        | 1.08          | 0.834          | 0.451                     |
|                                                                                                 | Coronary heart disease (incident)                         | 0.48          | 0.507          | 0.654                     |
|                                                                                                 | Type 2 diabetes                                           | 0.89          | 0.620          | 0.460                     |
| (3) Only high muscle fat (MFI)<br>vs<br>(4) Normal muscle composition                           | Low hand grip strength                                    | 1.62          | 0.072          | 0.190                     |
|                                                                                                 | Slow walking pace                                         | 3.59          | <0.001         | 0.021                     |
|                                                                                                 | No stair climbing                                         | 1.27          | 0.265          | 0.854                     |
|                                                                                                 | More than one fall last year                              | 1.60          | 0.094          | 0.447                     |
|                                                                                                 | Coronary heart disease (prevalent)                        | 1.38          | 0.248          | 0.922                     |
|                                                                                                 | Coronary heart disease (incident)                         | 0.79          | 0.663          | 0.497                     |
|                                                                                                 | Type 2 diabetes                                           | 2.64          | <0.001         | <0.001                    |



**Table S5** Comparison for the biomarker panel between different muscle composition groups within NAFLD: (1) adverse muscle composition (AMC), (2) low FFMV<sub>VCG</sub> only, (3) high MFI only, and (4) moderate to high FFMV<sub>VCG</sub> and low to moderate MFI (normal muscle composition). Factor shows difference in mean of outcomes between the two groups. p-values shown for unadjusted and adjusted (sex, age, BMI, liver fat) modelling. † Data extracted from baseline assessment (years 2006-2010). FFMV, fat-tissue free muscle volume; MFI, muscle fat infiltration; VCG, virtual control group adjusted

| Muscle composition groups within NAFLD                                                    | Biomarker panel†             | Factor | p-value | p-value (adjusted) |
|-------------------------------------------------------------------------------------------|------------------------------|--------|---------|--------------------|
| (1) Adverse muscle composition (AMC) vs (4) Normal muscle composition                     | Glycated haemoglobin (HbA1c) | 1.08   | <0.001  | 0.001              |
|                                                                                           | Glucose                      | 1.08   | 0.002   | 0.026              |
|                                                                                           | Albumin                      | 0.98   | 0.001   | 0.034              |
|                                                                                           | Direct bilirubin             | 0.99   | 0.884   | 0.980              |
|                                                                                           | Total bilirubin              | 0.95   | 0.252   | 0.374              |
|                                                                                           | Gamma glutamyltransferase    | 1.16   | 0.070   | 0.111              |
|                                                                                           | Alanine aminotransferase     | 0.94   | 0.197   | 0.235              |
|                                                                                           | Aspartate aminotransferase   | 0.97   | 0.425   | 0.178              |
|                                                                                           | Cholesterol                  | 0.98   | 0.354   | 0.563              |
|                                                                                           | HDL-cholesterol              | 1.02   | 0.254   | 0.275              |
|                                                                                           | LDL direct                   | 0.97   | 0.129   | 0.267              |
|                                                                                           | Triglycerides                | 1.04   | 0.443   | 0.289              |
|                                                                                           | C-reactive protein           | 1.31   | 0.021   | 0.072              |
|                                                                                           | AST:ALT                      | 1.04   | 0.175   | 0.327              |
|                                                                                           | FIB-4                        | 1.04   | 0.331   | 0.031              |
| NAFLD fibrosis score (NFS)                                                                | 0.86                         | 0.003  | 0.262   |                    |
| (1) Adverse muscle composition (AMC) vs (2) Only low muscle volume (FFMV <sub>VCG</sub> ) | Glycated haemoglobin (HbA1c) | 1.04   | 0.058   | 0.381              |
|                                                                                           | Glucose                      | 1.05   | 0.164   | 0.456              |
|                                                                                           | Albumin                      | 0.98   | 0.007   | 0.132              |
|                                                                                           | Direct bilirubin             | 1.04   | 0.460   | 0.334              |
|                                                                                           | Total bilirubin              | 1.04   | 0.547   | 0.305              |
|                                                                                           | Gamma glutamyltransferase    | 1.10   | 0.369   | 0.580              |
|                                                                                           | Alanine aminotransferase     | 1.06   | 0.463   | 0.617              |
|                                                                                           | Aspartate aminotransferase   | 1.04   | 0.380   | 0.685              |
|                                                                                           | Cholesterol                  | 1.00   | 1.000   | 0.740              |
|                                                                                           | HDL-cholesterol              | 1.00   | 0.941   | 0.838              |
|                                                                                           | LDL direct                   | 1.00   | 0.942   | 0.745              |
|                                                                                           | Triglycerides                | 1.05   | 0.429   | 0.454              |
|                                                                                           | C-reactive protein           | 1.22   | 0.205   | 0.771              |
|                                                                                           | AST:ALT                      | 1.02   | 0.569   | 0.456              |
|                                                                                           | FIB-4                        | 1.08   | 0.141   | 0.567              |
| NAFLD fibrosis score (NFS)                                                                | 0.80                         | 0.001  | 0.667   |                    |
| (1) Adverse muscle composition (AMC) vs (3) Only high muscle fat (MFI)                    | Glycated haemoglobin (HbA1c) | 1.01   | 0.588   | 0.751              |
|                                                                                           | Glucose                      | 1.00   | 0.969   | 0.906              |
|                                                                                           | Albumin                      | 1.01   | 0.069   | 0.366              |
|                                                                                           | Direct bilirubin             | 1.05   | 0.249   | 0.983              |
|                                                                                           | Total bilirubin              | 1.03   | 0.514   | 0.542              |
|                                                                                           | Gamma glutamyltransferase    | 1.04   | 0.677   | 0.836              |
|                                                                                           | Alanine aminotransferase     | 0.94   | 0.279   | 0.129              |
|                                                                                           | Aspartate aminotransferase   | 0.95   | 0.146   | 0.050              |
|                                                                                           | Cholesterol                  | 1.00   | 0.815   | 0.673              |
|                                                                                           | HDL-cholesterol              | 1.00   | 0.925   | 0.259              |
|                                                                                           | LDL direct                   | 0.98   | 0.424   | 0.853              |
| Triglycerides                                                                             | 1.05                         | 0.329  | 0.446   |                    |

|                                                                                           |                              |      |        |        |
|-------------------------------------------------------------------------------------------|------------------------------|------|--------|--------|
|                                                                                           | C-reactive protein           | 0.90 | 0.326  | 0.742  |
|                                                                                           | AST:ALT                      | 1.04 | 0.228  | 0.173  |
|                                                                                           | FIB-4                        | 0.99 | 0.757  | 0.015  |
|                                                                                           | NAFLD fibrosis score (NFS)   | 1.10 | 0.137  | 0.059  |
| (2) Only low muscle volume (FFMV <sub>VCG</sub> )<br>vs<br>(4) Normal muscle composition  | Glycated haemoglobin (HbA1c) | 1.03 | 0.068  | 0.071  |
|                                                                                           | Glucose                      | 1.03 | 0.322  | 0.291  |
|                                                                                           | Albumin                      | 1.00 | 0.680  | 0.969  |
|                                                                                           | Direct bilirubin             | 0.95 | 0.314  | 0.250  |
|                                                                                           | Total bilirubin              | 0.91 | 0.088  | 0.043  |
|                                                                                           | Gamma glutamyltransferase    | 1.05 | 0.630  | 0.468  |
|                                                                                           | Alanine aminotransferase     | 0.89 | 0.048  | 0.099  |
|                                                                                           | Aspartate aminotransferase   | 0.93 | 0.083  | 0.094  |
|                                                                                           | Cholesterol                  | 0.98 | 0.427  | 0.364  |
|                                                                                           | HDL-cholesterol              | 1.03 | 0.288  | 0.478  |
|                                                                                           | LDL direct                   | 0.97 | 0.166  | 0.172  |
|                                                                                           | Triglycerides                | 0.98 | 0.774  | 0.982  |
|                                                                                           | C-reactive protein           | 1.07 | 0.633  | 0.217  |
|                                                                                           | AST:ALT                      | 1.02 | 0.628  | 0.966  |
|                                                                                           | FIB-4                        | 0.96 | 0.353  | 0.009  |
|                                                                                           | NAFLD fibrosis score (NFS)   | 1.08 | 0.138  | 0.127  |
| (2) Only low muscle volume (FFMV <sub>VCG</sub> )<br>vs<br>(3) Only high muscle fat (MFI) | Glycated haemoglobin (HbA1c) | 0.97 | 0.109  | 0.509  |
|                                                                                           | Glucose                      | 0.96 | 0.137  | 0.374  |
|                                                                                           | Albumin                      | 1.03 | <0.001 | 0.018  |
|                                                                                           | Direct bilirubin             | 1.01 | 0.840  | 0.300  |
|                                                                                           | Total bilirubin              | 1.00 | 0.934  | 0.108  |
|                                                                                           | Gamma glutamyltransferase    | 0.94 | 0.538  | 0.681  |
|                                                                                           | Alanine aminotransferase     | 0.89 | 0.079  | 0.069  |
|                                                                                           | Aspartate aminotransferase   | 0.91 | 0.025  | 0.036  |
|                                                                                           | Cholesterol                  | 1.00 | 0.837  | 0.996  |
|                                                                                           | HDL-cholesterol              | 1.00 | 0.870  | 0.461  |
|                                                                                           | LDL direct                   | 0.98 | 0.434  | 0.615  |
|                                                                                           | Triglycerides                | 1.00 | 0.996  | 0.882  |
|                                                                                           | C-reactive protein           | 0.74 | 0.024  | 0.977  |
|                                                                                           | AST:ALT                      | 1.02 | 0.660  | 0.713  |
|                                                                                           | FIB-4                        | 0.92 | 0.058  | 0.007  |
|                                                                                           | NAFLD fibrosis score (NFS)   | 1.37 | <0.001 | 0.038  |
| (3) Only high muscle fat (MFI)<br>vs<br>(4) Normal muscle composition                     | Glycated haemoglobin (HbA1c) | 1.07 | <0.001 | 0.001  |
|                                                                                           | Glucose                      | 1.08 | <0.001 | 0.006  |
|                                                                                           | Albumin                      | 0.97 | <0.001 | <0.001 |
|                                                                                           | Direct bilirubin             | 0.94 | 0.080  | 0.956  |
|                                                                                           | Total bilirubin              | 0.92 | 0.022  | 0.802  |
|                                                                                           | Gamma glutamyltransferase    | 1.12 | 0.102  | 0.113  |
|                                                                                           | Alanine aminotransferase     | 1.00 | 0.927  | 0.569  |
|                                                                                           | Aspartate aminotransferase   | 1.03 | 0.308  | 0.339  |
|                                                                                           | Cholesterol                  | 0.99 | 0.419  | 0.225  |
|                                                                                           | HDL-cholesterol              | 1.02 | 0.212  | 0.863  |
|                                                                                           | LDL direct                   | 0.99 | 0.452  | 0.294  |
|                                                                                           | Triglycerides                | 0.98 | 0.690  | 0.799  |
|                                                                                           | C-reactive protein           | 1.46 | <0.001 | 0.093  |
|                                                                                           | AST:ALT                      | 1.00 | 0.995  | 0.540  |
|                                                                                           | FIB-4                        | 1.05 | 0.105  | 0.534  |
|                                                                                           | NAFLD fibrosis score (NFS)   | 0.79 | <0.001 | 0.265  |

## Supplementary references

1. Reeder SB, Cruite I, Hamilton G, Sirlin CB. Quantitative Assessment of Liver Fat with Magnetic Resonance Imaging and Spectroscopy. *JMRI* 2011;34(4):spcone. [10.1002/jmri.22775](https://doi.org/10.1002/jmri.22775)
2. Hamilton G, Yokoo T, Bydder M, Cruite I, Schroeder ME, Sirlin CB, Middleton MS. In Vivo Characterization of the Liver Fat <sup>1</sup>H MR Spectrum. *NMR Biomed* 2011;24(7):784–90. [10.1002/nbm.1622](https://doi.org/10.1002/nbm.1622)
3. Romu T, Borga M, OD Leinhard. MANA-Multi Scale Adaptive Normalized Averaging. In: Proceedings of the 2011 IEEE International Symposium on Biomedical Imaging. 2011;361-4. [10.1109/ISBI.2011.5872424](https://doi.org/10.1109/ISBI.2011.5872424)
4. OD Leinhard, A Johansson, J Rydell, Smedby Ö, Nyström F, Lundberg P, Borga M. Quantitative Abdominal Fat Estimation Using MRI Pattern Recognition. In: Proceedings of the 19<sup>th</sup> International Conference on Pattern Recognition (ICPR) 08-11 Dec, 2008; Tampa, FL. [10.1109/ICPR.2008.4761764](https://doi.org/10.1109/ICPR.2008.4761764)
5. Peterson P, Romu T, Brorson H, Dahlqvist Leinhard O, Månsson S. Fat Quantification in Skeletal Muscle Using Multigradient-Echo Imaging: Comparison of Fat and Water References. *JMRI* 2016;43:203–12. [10.1002/jmri.24972](https://doi.org/10.1002/jmri.24972)
6. Karlsson A, Rosander J, Romu T, Tallberg J, Grönqvist A, Borga M, Dahlqvist Leinhard O. Automatic and Quantitative Assessment of Regional Muscle Volume by Multi-Atlas Segmentation Using Whole-Body Water–Fat MRI. *JMRI* 2015;41(6):1558-69. [10.1002/jmri.24726](https://doi.org/10.1002/jmri.24726)
7. West J, Romu T, Thorell S, Lindblom H, Berin E, Spetz Holm A, Lindh Åstrand L, Karlsson A, Borga M, Hammar M, Dahlqvist Leinhard O. Precision of MRI-based body composition measurements of postmenopausal women. *PLoS One* 2018;13(2):e0192495. [10.1371/journal.pone.0192495](https://doi.org/10.1371/journal.pone.0192495)
8. West J, Dahlqvist Leinhard O, Romu T, et al. Feasibility of MR-based body composition analysis in large scale population studies. *PLoS ONE* 2016; 11:e0163332. [10.1371/journal.pone.0163332](https://doi.org/10.1371/journal.pone.0163332)
9. Borga M, Thomas EL, Romu T, et al. Validation of a fast method for quantification of intra-abdominal and subcutaneous adipose tissue for large scale human studies. *NMR Biomed* 2015;28:1747-1753. [10.1002/nbm.3432](https://doi.org/10.1002/nbm.3432)
