# Supplementary material for: Adverse muscle composition is linked to poor functional performance and metabolic comorbidities in NAFLD
Source: PubMed Central journal article supplement — JHEP Rep. 2020 Oct 28;3(1):100197. doi: 10.1016/j.jhepr.2020.100197 (PMC7868647; doi:10.1016/j.jhepr.2020.100197), 2020-10-28
Supplement: mmc2.pdf [file mmc2.pdf]

## JHEP Reports

### CTAT methods

Tables for a “Complete, Transparent, Accurate and Timely account” (CTAT) are now mandatory for all revised submissions. The aim is to enhance the reproducibility of methods.

- Only include the parts relevant to your study
- Refer to the CTAT in the main text as ‘Supplementary CTAT Table’
- Do not add subheadings
- Add as many rows as needed to include all information
- Only include one item per row

If the CTAT form is not relevant to your study, please outline the reasons why:

|  |
|--|
|  |
|--|

#### 1.1 Antibodies

| Name | Citation | Supplier | Cat no. | Clone no. |
|------|----------|----------|---------|-----------|
|      |          |          |         |           |

#### 1.2 Cell lines

| Name | Citation | Supplier | Cat no. | Passage no. | Authentication test method |
|------|----------|----------|---------|-------------|----------------------------|
|      |          |          |         |             |                            |

#### 1.3 Organisms

| Name | Citation | Supplier | Strain | Sex | Age | Overall n number |
|------|----------|----------|--------|-----|-----|------------------|
|      |          |          |        |     |     |                  |

#### 1.4 Sequence based reagents

| Name | Sequence | Supplier |
|------|----------|----------|
|      |          |          |

#### 1.5 Biological samples

| Description | Source | Identifier |
|-------------|--------|------------|
|             |        |            |

#### 1.6 Deposited data

| Name of repository | Identifier | Link                                                                  |
|--------------------|------------|-----------------------------------------------------------------------|
| UK Biobank         | -          | <a href="https://www.ukbiobank.ac.uk">https://www.ukbiobank.ac.uk</a> |

## 1.7 Software

| Software name    | Manufacturer                          | Version |
|------------------|---------------------------------------|---------|
| AMRA® Researcher | AMRA Medical AB,<br>Linköping, Sweden |         |
| R                | The R Foundation, Vienna,<br>Austria  | 3.4.4   |

## 1.8 Other (e.g. drugs, proteins, vectors etc.)

|  |  |  |
|--|--|--|
|  |  |  |
|  |  |  |

## 1.9 Please provide the details of the corresponding methods author for the manuscript:

Jennifer Linge  
Badhusgatan 5  
58222 Linköping  
Sweden

Phone: +46 72-399 70 29

Email: [jennifer.linge@amramedical.com](mailto:jennifer.linge@amramedical.com)

## 2.0 Please confirm for randomised controlled trials all versions of the clinical protocol are included in the submission. These will be published online as supplementary information.

|  |
|--|
|  |
|--|
